# Supplementary material
Source: Springer Nature journal article supplement (http://www.nature.com/msb/journal/v1/n1/extref/msb4100004-s6.pdf)
Supplement: msb4100004-s6.pdf [file msb4100004-s6.pdf]

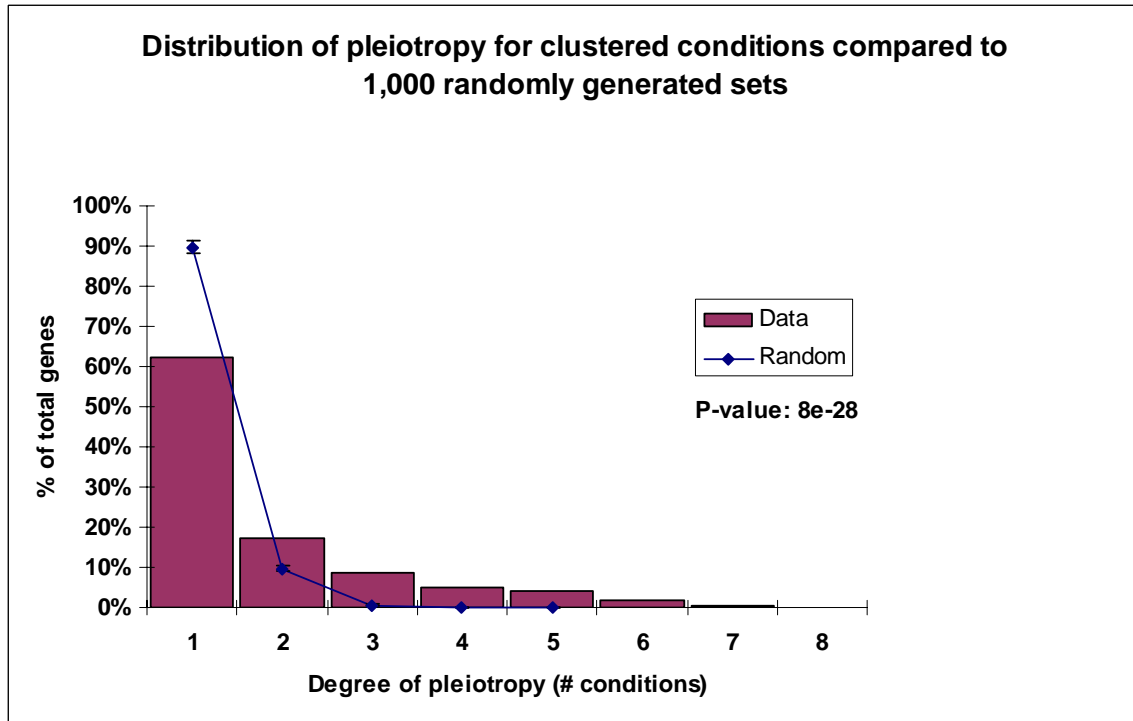

**Supplementary Figure 6.** Distribution of pleiotropy for clustered conditions from Supplemental Figure 5, compared to 1,000 randomly generated sets. These distributions are significantly different as assessed by the Kolmogorov-Smirnov test with a p-value of  $8 \times 10^{-28}$ .
